# Supplementary material for: Empowering Primary Care with the World Health Organization’s Basic Package of Interventions for Rehabilitation: Developing a List of Interventions and a Clinical Resource
Source: Research Square preprint supplement (doi:10.21203/rs.3.rs-5607651/v1), 2025-03-05
Supplement: Supplementary file 1 [file aaac437c0141c1e153e9d06e.pdf]

**Supplementary file 1: Discussion questions for primary care non-rehabilitation worker feedback**

- Are there any features you find confusing or difficult to use?
- Is anything missing?
- Are the instructions practical and easy to implement?
